# Supplementary material
Source: PubMed Central journal article supplement (PMC5487668)

1 Figure S1. Evaluating the activity of the screening cell lines. A) 0.2ng of siTat or siGFP  
2 control were transfected to the Rev-RRE reporter cell line. After 48 hours, luciferase  
3 assays were performed as previously described. This procedure effectively knocked  
4 down reporter activity while the mock transfected and siGFP control had only a modest  
5 effect on reporter output. Using this method we were able to identify two RRE IIB-Rev  
6 cell lines with  $z'$  values of 0.69 and 0.75 that were used for the small molecule library  
7 screen. B) We also tested the cell lines using the 3,6 diaminoacridine as a control  
8 compound that inhibits expression of the reporter.

9

10 A.

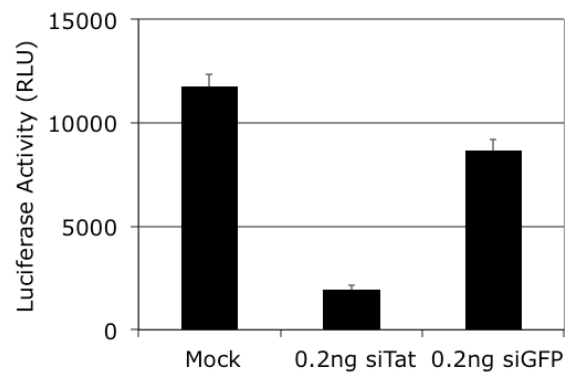

11

12

13

14

15

16

B.

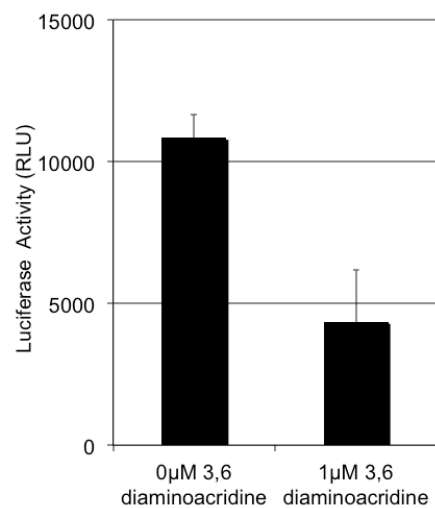

17 Figure S2. Testing conditions and reproducibility of the screening assay. Compounds  
18 were tested in duplicate and luciferase assays were performed. In the graph below the red  
19 and blue symbols represent independent duplicate samples. In most cases, the activity  
20 levels of the duplicate sample have a difference of less than 10%. In cases in which the  
21 variation was greater than 10%, most conferred activation of the luciferase activity, rather  
22 than inhibition, and these were not analyzed further. In cases where the duplicates were  
23 ambiguous, samples were retested. Most commonly, those compounds were moderately  
24 toxic leading to greater variation.  
25

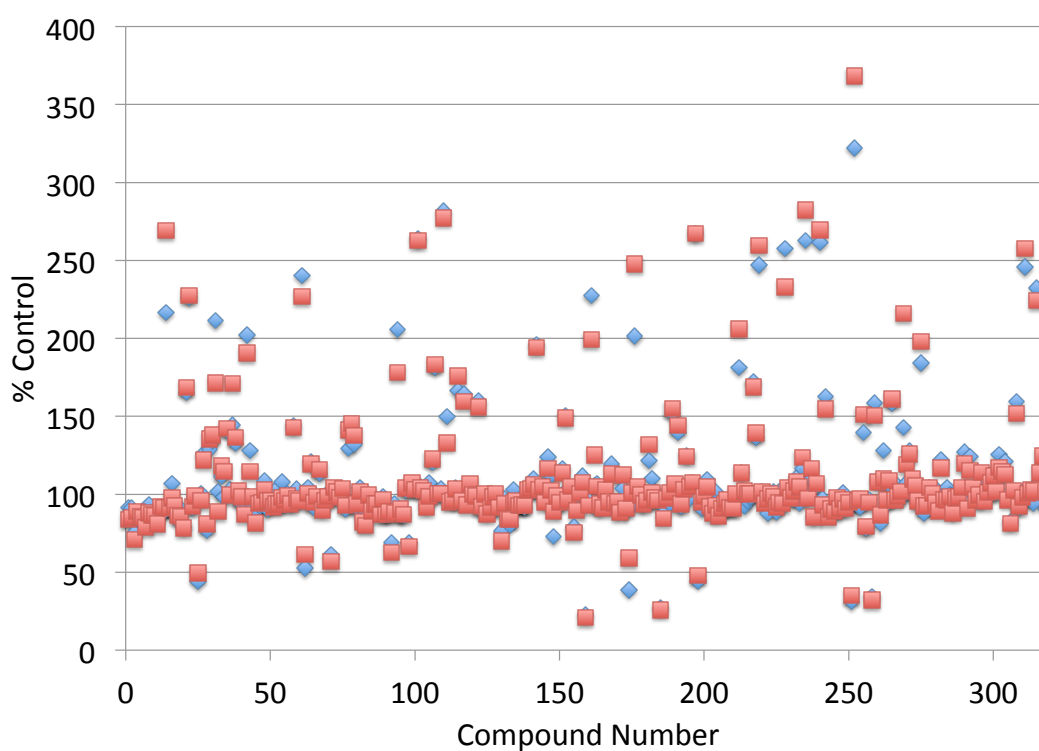

26 Figure S3. Screening Hits. The compounds in Figure S3 are the hits from the library  
27 screen. These compounds conferred greater than 50% inhibition in the screening assay  
28 although we did not obtain detailed follow up SAR for the benzopyran or thiophene  
29 classes.

### 8 Thienopyridines

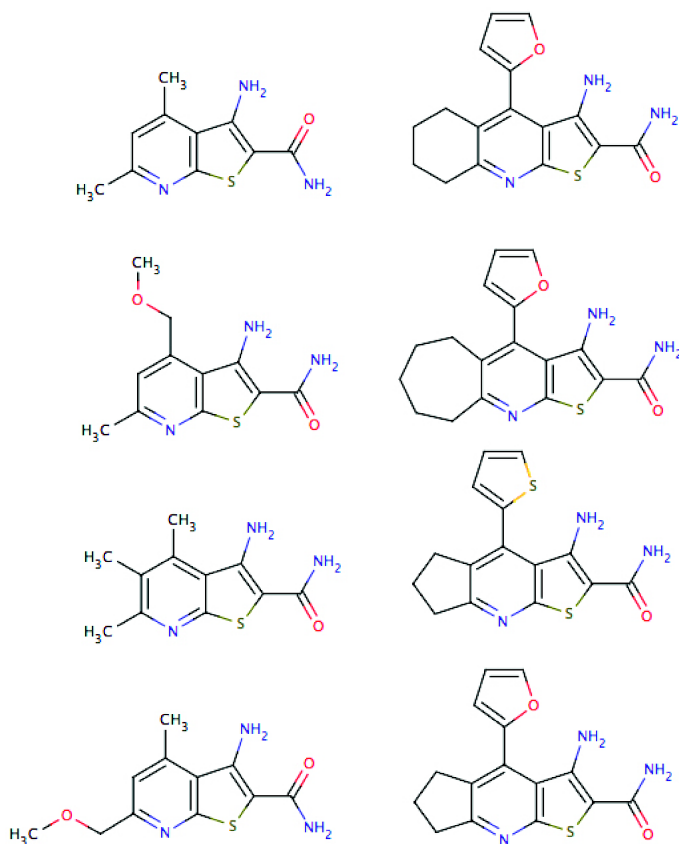

### 2 Benzopyrans

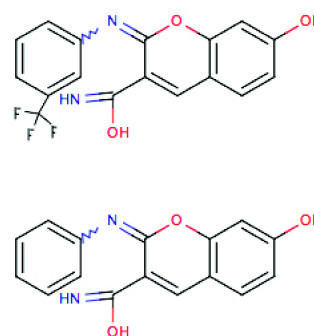

### 1 Thiophene

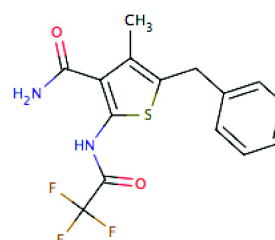

31 Figure S4. Electrophoretic mobility shift assay (EMSA) reveals inhibition of the Rev-  
32 RRE IIB interaction. Titration experiments with RevPeptide and  $^{32}\text{P}$  labeled RRE IIB  
33 RNA were performed in order to determine conditions in which approximately 50% of  
34 the RNA was shifted to a higher mobility as shown in the DMSO lane. Small molecule  
35 compounds were incubated in the binding reactions at 100  $\mu\text{M}$  followed by EMSA. The  
36 two small molecule control inhibitors 3,6 diaminoacridine and Neomycin B both  
37 abolished the shift of the complex suggesting that these compounds disrupt the RNA-  
38 protein interaction. Neomycin B treatment consistently results in a shift upwards of the  
39 RNA. The two thiophene compounds 1259 and 1267 also inhibited the formation of the  
40 shifted complex suggesting that these compounds disrupt the RNA-protein interaction.  
41

IIB +  
RevPeptide<sub>20nm</sub>

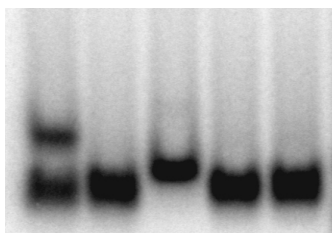

DMSO

3,6 diaminoacridine

Neomycin B

1259

1267

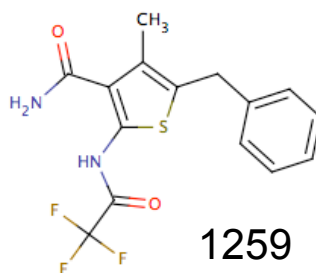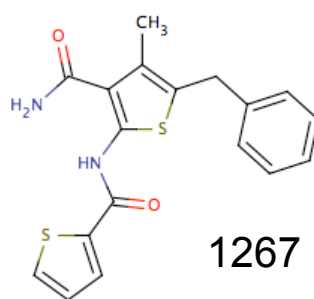

42

43

44 Table S1. Activity of thienopyridine analogs in the U1 latency assay, Tat-hybrid assay, -  
 45 and MTT toxicity.

46

47

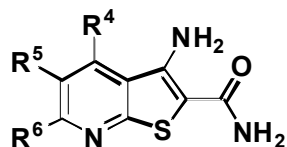

| compound | R <sup>4</sup>                                                     | R <sup>5</sup>                                                     | R <sup>6</sup> | U1 IC <sub>50</sub><br>(μM) | Tat-hybrid<br>(%Inhibition) | MTT TC <sub>50</sub><br>(μM) |
|----------|--------------------------------------------------------------------|--------------------------------------------------------------------|----------------|-----------------------------|-----------------------------|------------------------------|
| 1        | Me                                                                 | Et                                                                 | Me             | 0.4                         | 65                          | >38                          |
| 2        | H                                                                  | H                                                                  | Me             | 2.11                        | 14                          | >75                          |
| 3        | H                                                                  | H                                                                  | <i>n</i> -Bu   | 2.03                        | 0                           | 58.4                         |
| 4        | NMe <sub>2</sub>                                                   | H                                                                  | H              | <0.28                       | 57                          | >75                          |
| 5        | CH <sub>2</sub> OMe                                                | H                                                                  | Me             | <0.52                       | 63                          | >75                          |
| 6        | CF <sub>3</sub>                                                    | H                                                                  | Me             | <0.24                       | 67                          | >75                          |
| 7        | H                                                                  | Me                                                                 | Me             | 1.06                        | 48                          | 37                           |
| 8        | H                                                                  | -CH <sub>2</sub> CH <sub>2</sub> CH <sub>2</sub> -                 |                | 2.19                        | 0                           | >75                          |
| 9        | H                                                                  | -CH <sub>2</sub> CH <sub>2</sub> CH <sub>2</sub> CH <sub>2</sub> - |                | 1.94                        | 0                           | >75                          |
| 10       | H                                                                  | Me                                                                 | 4-FPh          | 6.19                        | 8                           | >75                          |
| 11       | Me                                                                 | CH <sub>2</sub> COPh                                               | Me             | 0.75                        | 52                          | >75                          |
| 12       | -NHPPh                                                             | H                                                                  | H              | <0.24                       | 0                           | 53                           |
| 13       | H                                                                  | H                                                                  | pyridyl        | 23.4                        | 0                           | >75                          |
| 14       | CF <sub>3</sub>                                                    | H                                                                  | Bn             | 2.37                        | 10                          | >75                          |
| 15       | 4-FPh                                                              | H                                                                  | thiophene      | 8.84                        | 38                          | 17.4                         |
| 16       | tolyl                                                              | H                                                                  | Ph             | 0.75                        | 60                          | 22.6                         |
| 17       | 4-MeOPh                                                            | H                                                                  | 4-MeOPh        | 1.28                        | 51                          | 38.3                         |
| 18       | 4-MeOPh                                                            | H                                                                  | Ph             | 1.41                        | 51                          | 53.9                         |
| 19       | -CH <sub>2</sub> CH <sub>2</sub> CH <sub>2</sub> CH <sub>2</sub> - |                                                                    | morpholine     | 7.13                        | 35                          | >75                          |

48 Table S2. Data points and standard deviations for Figure 5.

49

| concentration | <b>1a</b> | <b>2b</b> | <b>4e</b> | <b>1a stdev</b> | <b>2b stdev</b> | <b>4d stdev</b> |
|---------------|-----------|-----------|-----------|-----------------|-----------------|-----------------|
| 1             | 1.1467    | 1.5444    | 1.2524    | 0.1246          | 0.3053          | 0.1577          |
| 3.16          | 1.1400    | 1.2768    | 0.6510    | 0.0411          | 0.2014          | 0.1228          |
| 10            | 1.1270    | 1.0411    | 0.4718    | 0.1770          | 0.1920          | 0.0704          |
| 31.6          | 1.0482    | 0.8280    | 0.2041    | 0.1075          | 0.1336          | 0.0398          |
| 100           | 1.0328    | 0.4076    | 0.0926    | 0.0978          | 0.0919          | 0.0114          |
| 316           | 0.8368    | 0.1144    | 0.0494    | 0.0550          | 0.0533          | 0.0133          |
| 1000          | 0.5891    | 0.0332    | 0.0289    | 0.0756          | 0.0059          | 0.0026          |
| 3160          | 0.2425    | 0.0061    | 0.0102    | 0.0322          | 0.0106          | 0.0020          |

50

51 Table S3. Data points and standard deviations for Figure 9.

52

|                   | day 4      | day 6      | day 8      | day 11     |
|-------------------|------------|------------|------------|------------|
| 1000nM 2b Average | 163.494133 | 38.3566333 | 106.99     | 849.242767 |
| 316nM 2b Average  | 204.4446   | 89.3033667 | 3167.51623 | 12585.9121 |
| 100nM 2b Average  | 199.3502   | 163.492967 | 1518.14897 | 11754.1413 |
| 31.6nM 2b Average | 188.423167 | 720.114967 | 6283.59807 | 26297.5072 |
| 10nM 2b Average   | 104.504467 | 537.489633 | 5866.9493  | 25967.0032 |
| 3.16nM 2b Average | 221.809433 | 1192.81333 | 8992.60563 | 34532.432  |
| DmSO Average      | 302.860683 | 1201.76435 | 8349.96183 | 31162.5508 |
|                   |            |            |            |            |
| 1000nM 2b Stdev   | 23.59891   | 4.13620916 | 33.8632124 | 916.415784 |
| 316nM 2b Stdev    | 18.1375439 | 62.6337768 | 4858.14671 | 12828.9292 |
| 100nM 2b Stdev    | 6.39458583 | 56.6260544 | 411.19795  | 1027.3798  |
| 31.6nM 2b Stdev   | 122.831693 | 503.558663 | 2803.9239  | 10631.9251 |
| 10nM 2b Stdev     | 109.166695 | 229.754705 | 192.291074 | 2992.5268  |
| 3.16nM 2b Stdev   | 50.4829612 | 454.263132 | 1807.99243 | 6507.2062  |
| DmSO Stdev        | 81.0236065 | 546.562496 | 872.552606 | 10617.9197 |
|                   |            |            |            |            |
|                   | day 4      | day 6      | day 8      | day 11     |
| 1000nM 4e Average | 158.0925   | 49.8917667 | 65.9066667 | 121.052767 |
| 316nM 4e Average  | 96.1949    | 51.5146    | 99.7212333 | 3589.95223 |
| 100nM 4e Average  | 90.8807333 | 62.1335    | 132.7636   | 5075.53777 |
| 31.6nM 4e Average | 86.1408333 | 130.8166   | 686.7589   | 8367.03223 |
| 10nM 4e Average   | 104.513433 | 235.257467 | 2250.9272  | 15675.262  |
| 3.16nM 4e Average | 54.0278    | 289.272467 | 3405.38157 | 22545.7145 |
| DmSO Average      | 167.223967 | 606.567217 | 7464.18817 | 42170.3544 |
|                   |            |            |            |            |
| 1000nM 4e Stdev   | 21.70954   | 7.99158315 | 32.0080294 | 61.8425235 |
| 316nM 4e Stdev    | 23.8686368 | 20.0063079 | 43.4118813 | 4717.7648  |
| 100nM 4e Stdev    | 48.80698   | 10.0520444 | 20.0198932 | 6504.37409 |
| 31.6nM 4e Stdev   | 79.3755485 | 34.0111614 | 422.655136 | 3035.82801 |
| 10nM 4e Stdev     | 18.349159  | 80.4493894 | 1153.57099 | 2794.8766  |
| 3.16nM 4e Stdev   | 33.0797158 | 184.641274 | 1802.69305 | 5538.31682 |
| DmSO Stdev        | 75.5779001 | 229.199322 | 1169.04521 | 7846.60415 |
|                   |            |            |            |            |
|                   | day 4      | day 6      | day 8      | day 11     |
| 1000nM 4h Average | 74.2060333 | 66.0407    | 124.133667 | 837.503167 |
| 316nM 4h Average  | 60.3931667 | 72.6754333 | 140.8883   | 243.7988   |
| 100nM 4h Average  | 102.4887   | 95.7632    | 206.240033 | 555.0323   |
| 31.6nM 4h Average | 87.173     | 138.1644   | 533.7081   | 7539.2763  |
| 10nM 4h Average   | 178.409067 | 208.094533 | 958.878767 | 9611.80507 |
| 3.16nM 4h Average | 278.536    | 350.3822   | 3151.4999  | 21771.2486 |
| DmSO Average      | 416.676933 | 1251.20628 | 9995.91372 | 38923.4121 |
|                   |            |            |            |            |
| 1000nM 4h Stdev   | 37.2094099 | 10.1005284 | 34.1845396 | 1016.17793 |
| 316nM 4h Stdev    | 42.2308501 | 11.7851801 | 16.8634793 | 186.031318 |
| 100nM 4h Stdev    | 65.7043251 | 12.2973106 | 77.6353892 | 592.309721 |
| 31.6nM 4h Stdev   | 7.5600187  | 22.1995829 | 20.0614822 | 2770.18754 |
| 10nM 4h Stdev     | 11.5869841 | 58.99948   | 198.571377 | 234.610719 |
| 3.16nM 4h Stdev   | 10.4016262 | 69.0497725 | 389.609229 | 164.016614 |
| DmSO Stdev        | 223.003543 | 505.682275 | 2205.18098 | 9489.22884 |

53

54 **Testing the specificity of the thienopyridine compounds using the Tat-hybrid**  
55 **reporter system.**

56

57 We tested the activity of Compound **4a** using the Tat-hybrid reporter assays using  
58 the HIV TAR reporter and HIV Tat protein (1-72) that activates this reporter, and  
59 compared these results to the Rev-RRE reporter demonstrating good specificity for Rev-  
60 RRE, as described below.

61 A 96 well plate was seeded with 10,000 293T cells. We transfected each well  
62 with 10 ng of the HIV TAR Luciferase reporter and 5 ng of the HIV Tat 1-72 expression  
63 construct or 10 ng of the HIV RRE IIB Luciferase reporter and 5 ng of the HIV Tat (1-  
64 48)-Rev 3-70 expression construct, and with 2 ng of a CMV Renilla luciferase control.  
65 Compound **4a** was added to a final concentration of 3.16, 10, 31.6, and 100 nM. Each  
66 condition was performed in quadruplet. Note, it was necessary to use transient  
67 transfection assays rather than stable cell lines in order to compare the two reporter  
68 systems, although the level of inhibition conferred by the compounds in the transient  
69 assays was lower than in the cell lines. The cells were incubated for 48 hours and dual  
70 luciferase assays were performed according to the manufacturers protocol (Promega).  
71 Reporter activity was normalized against the Renilla control. The results of this  
72 experiment are shown in Figure S5.

73

74



75 Figure S5. Thienopyridine compound **4a** specifically targets the Rev-RRE reporter. The  
76 expression of the HIV RRE IIb reporter was significantly inhibited in the presence of 100  
77 nM Compound **4a** while the expression of the HIV TAR reporter was not similarly  
78 inhibited.

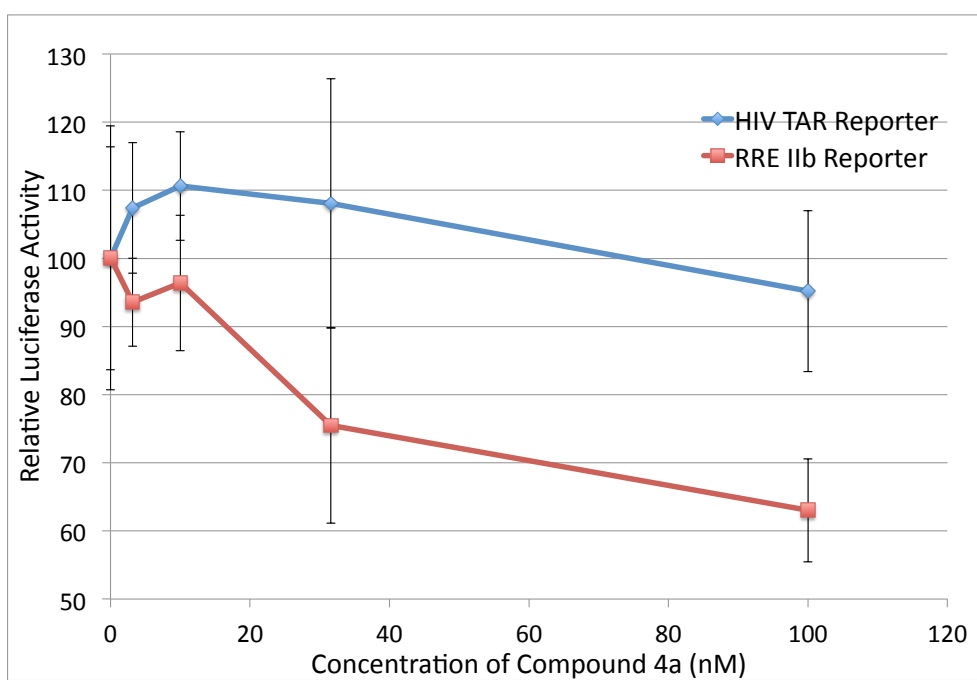

79

80 Figure S6. The A7854G mutation in the RRE confers resistance to 62.5 nM **4e**.  
81 Although we were initially concerned that the level of resistance conferred by the  
82 resistant-virus ( $IC_{50}$  5.1 nM) was nominal versus the NL4-3 control ( $IC_{50}$  6.2 nM),  
83 repeated analysis has shown that resistance is clear, especially at higher concentrations of  
84 compound. For example at 62.5 nM of compound **4e**, viral replication occurs at a 4-fold  
85 higher rate than the control (below). Notably, the  $IC_{90}$  is significantly higher for the  
86 A7854G mutant ( $IC_{90}$  218.5 nM) versus the control ( $IC_{90}$  25.9 nM). This result suggests  
87 that the target of the thienopyridine compounds is the RRE.

88

89

90

91

92

93

94

95

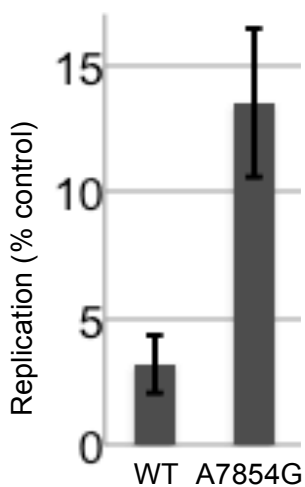

Supplement: AAC.02366-16_zac007176267s1.pdf [file AAC.02366-16_zac007176267s1.pdf]
